# Supplementary material for: High-throughput PCR assay design for targeted resequencing using primerXL
Source: PubMed Central journal article supplement (PMC5588703; doi:10.1186/s12859-017-1809-3), 2017-09-06

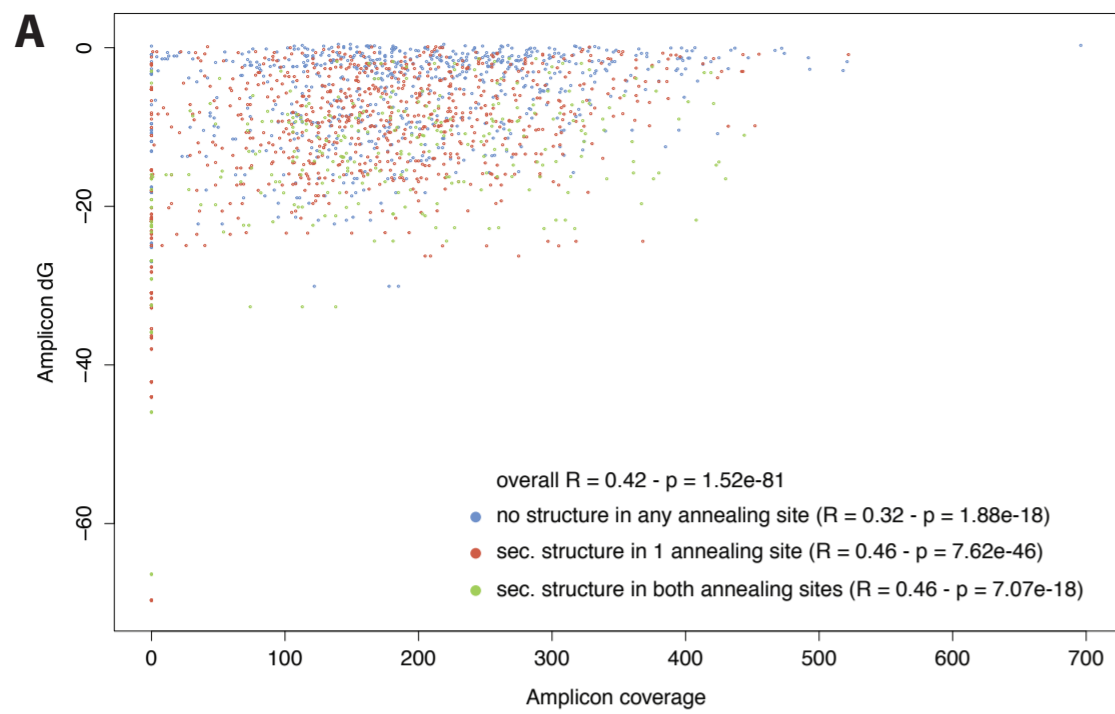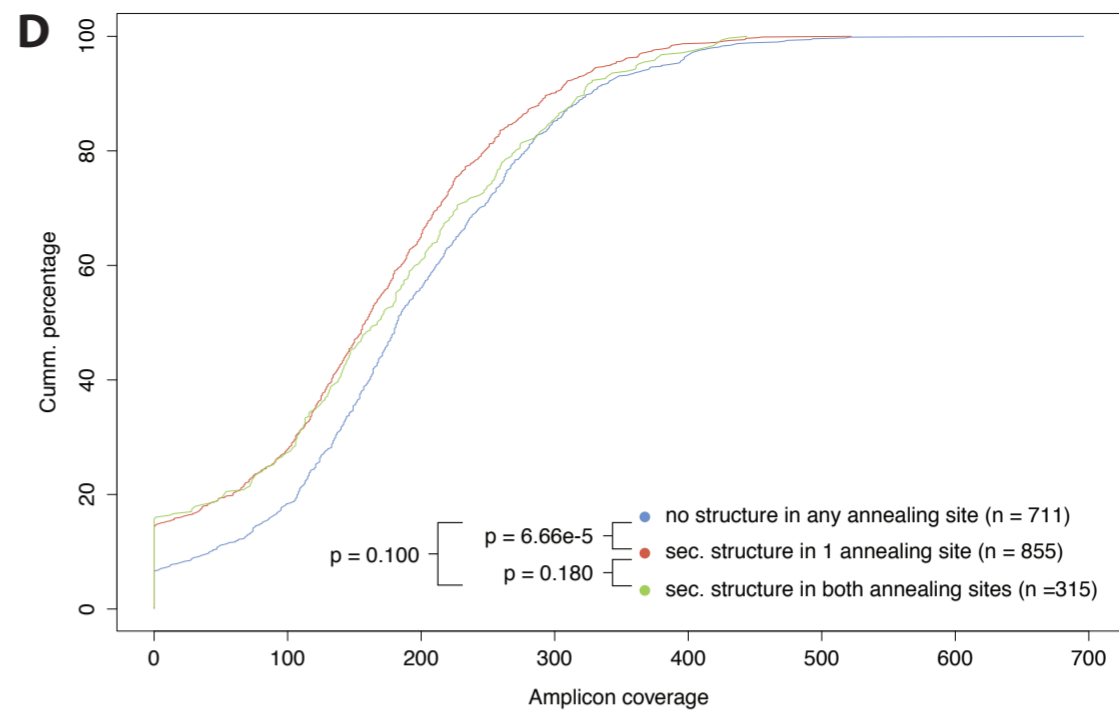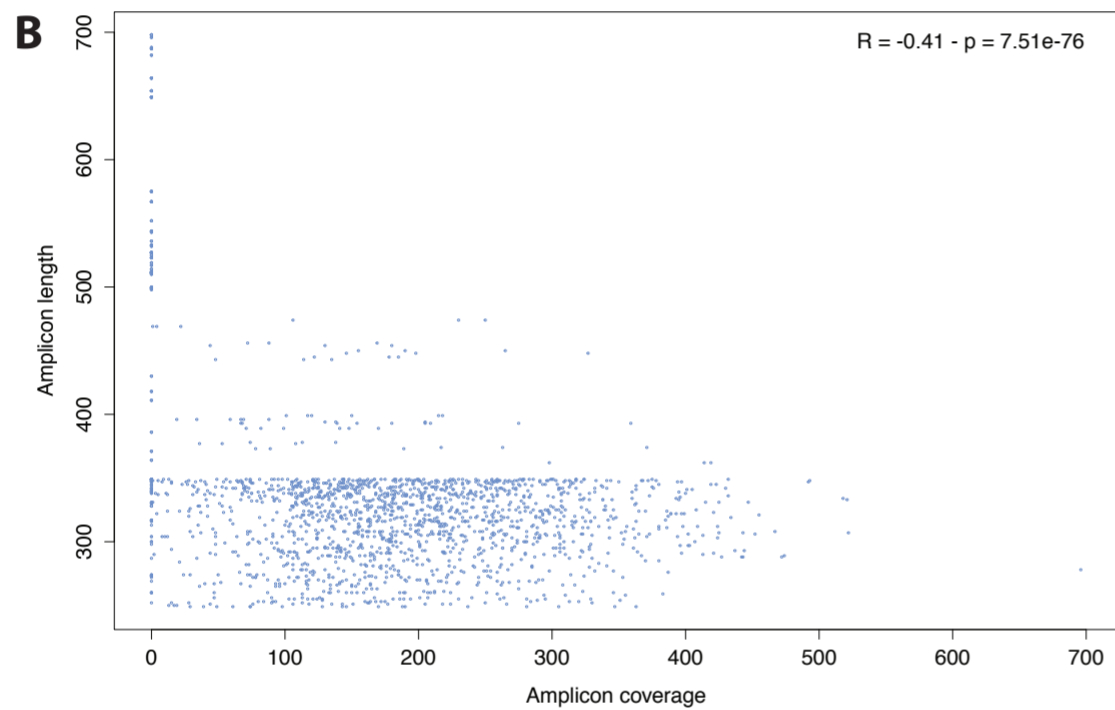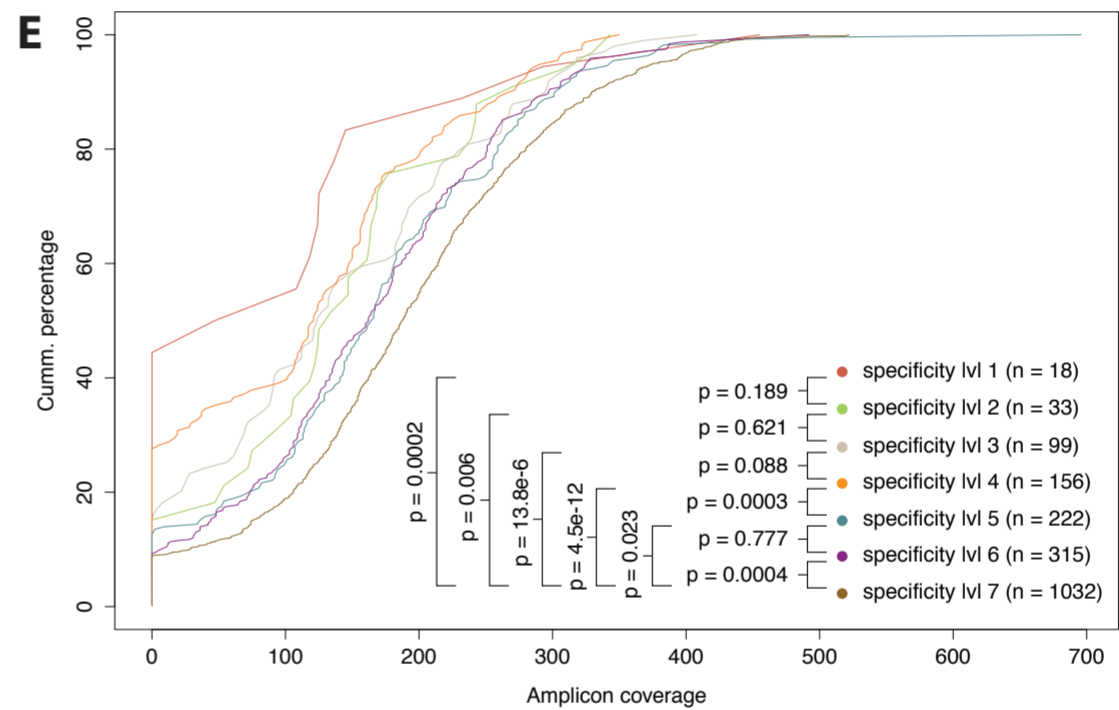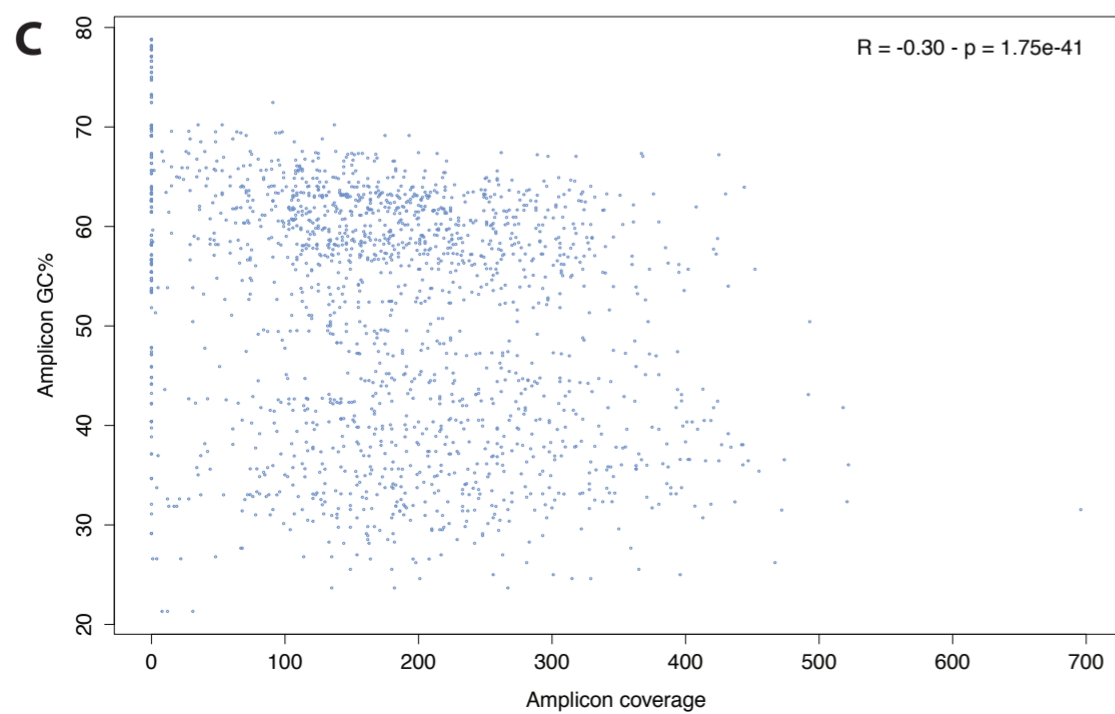

Supplement: 12859_2017_1809_MOESM1_ESM.pdf [file 12859_2017_1809_MOESM1_ESM.pdf]
